# Supplementary material for: Nitrogen substitution of bilayer penta-carbides: high solar-to-hydrogen conversion efficiency and excellent electrocatalytic activity for water splitting
Source: Royal Society of Chemistry journal article supplement (doi:10.1039/d4cp03887h), 2024-01-01
Supplement: d4cp03887h1.pdf [file d4cp03887h1.pdf]

## Supporting information

### Nitrogen substitution of bilayer penta-carbides: High solar-to-hydrogen and Excellent electrocatalysts for water splitting

Yaowen Long<sup>1</sup>, Hong Zhang<sup>1,2\*</sup>

<sup>1</sup>College of Physics, Sichuan University, Chengdu 610065, China

<sup>2</sup>Key Laboratory of High Energy Density Physics and Technology of Ministry of Education, Sichuan University, Chengdu 610065, China

\*Corresponding author: Hong Zhang, email: [hongzhang@scu.edu.cn](mailto:hongzhang@scu.edu.cn)

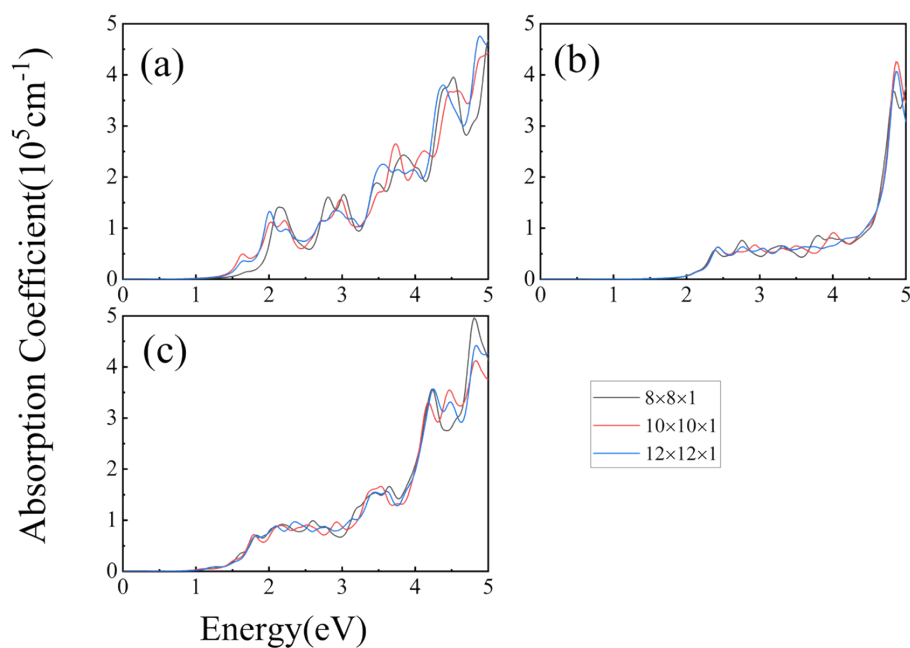

Fig. S1. K-mesh convergence test of a)  $p\text{-Ge}_2\text{C}_4/\text{Ge}_2\text{N}_2\text{C}_2$ , b)  $p\text{-Ge}_4\text{C}_8$ , c)  $p\text{-Ge}_4\text{N}_4\text{C}_4$ .

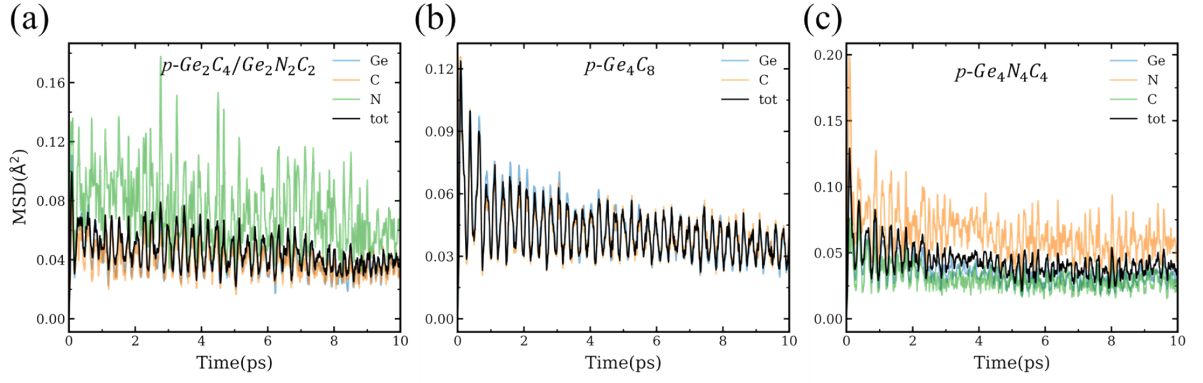

Fig. S2. The mean square displacement (MSD) of a)  $p\text{-Ge}_2\text{C}_4/\text{Ge}_2\text{N}_2\text{C}_2$ , b)  $p\text{-Ge}_4\text{C}_8$ , c)  $p\text{-Ge}_4\text{N}_4\text{C}_4$ .

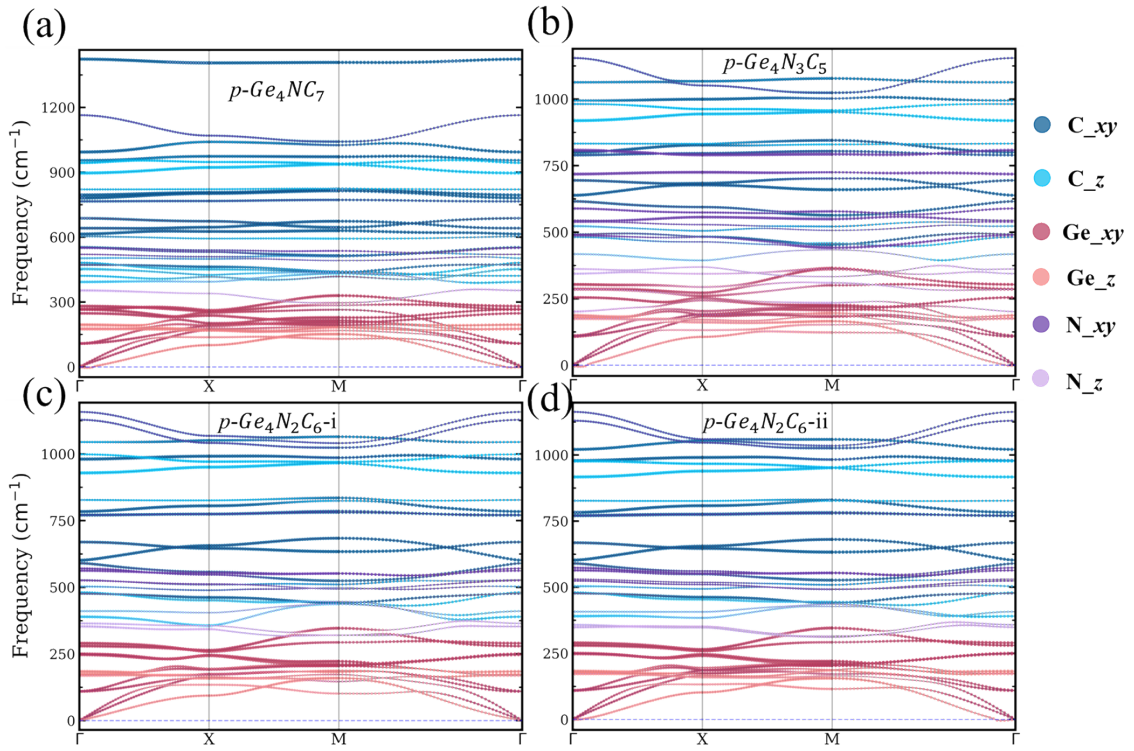

Fig. S3. Phonon dispersions of  $3\times 3\times 1$  supercell of a)  $p\text{-Ge}_4\text{NC}_7$ , b)  $p\text{-Ge}_4\text{N}_3\text{C}_5$ , c)  $p\text{-Ge}_4\text{N}_2\text{C}_6\text{-i}$  and d)  $p\text{-Ge}_4\text{N}_2\text{C}_6\text{-ii}$ .

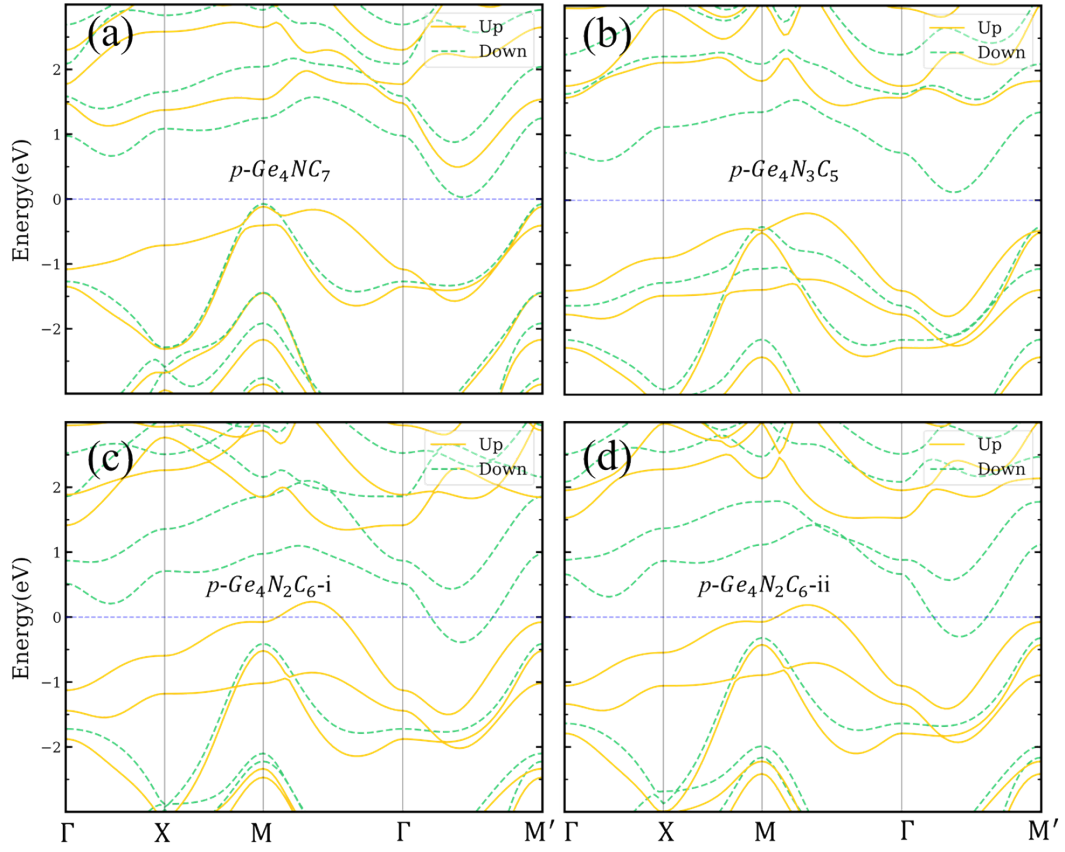

Fig. S4. Band structures of a)  $p\text{-Ge}_4\text{NC}_7$ , b)  $p\text{-Ge}_4\text{N}_3\text{C}_5$ , c)  $p\text{-Ge}_4\text{N}_2\text{C}_6\text{-i}$  and d)  $p\text{-Ge}_4\text{N}_2\text{C}_6\text{-ii}$  from HSE06 calculations.
